# Supplementary material for: Ni3S2@CoS core–shell nano-triangular pyramid arrays on Ni foam for high-performance supercapacitors
Source: Royal Society of Chemistry journal article supplement (doi:10.1039/c5cp01945a), 2015-01-01
Supplement: c5cp01945a1.pdf [file c5cp01945a1.pdf]

## Supporting Information

### $\text{Ni}_3\text{S}_2$ @CoS core-shell nano-triangular pyramid arrays on Ni foam

#### for high-performance supercapacitors

Rui Li, Senlin Wang,<sup>\*a</sup> Jianpeng Wang, and Zongchuan Huang

<sup>a</sup>College of Materials Science & Engineering, Huaqiao University, Xiamen, Fujian, 361021, People's Republic of China. Fax: +86-595-22693746. E-mail address: slwang@hqu.edu.cn

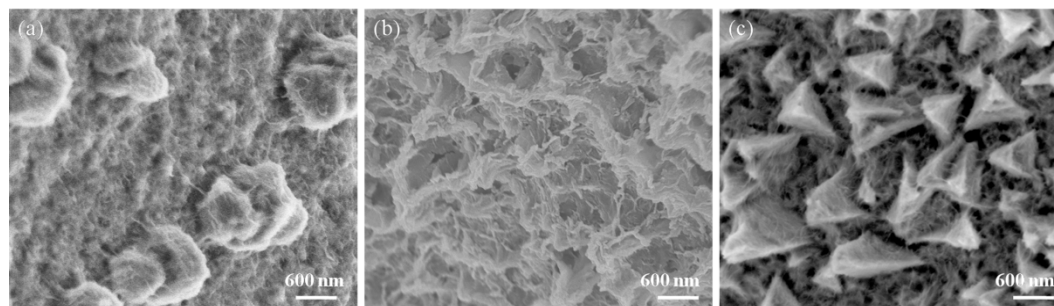

**Fig. S1** SEM images of the  $\text{Ni}_3\text{S}_2$  obtained by different hydrothermal reaction temperature:

(a)120 °C, (b) 140 °C and (c) 160 °C

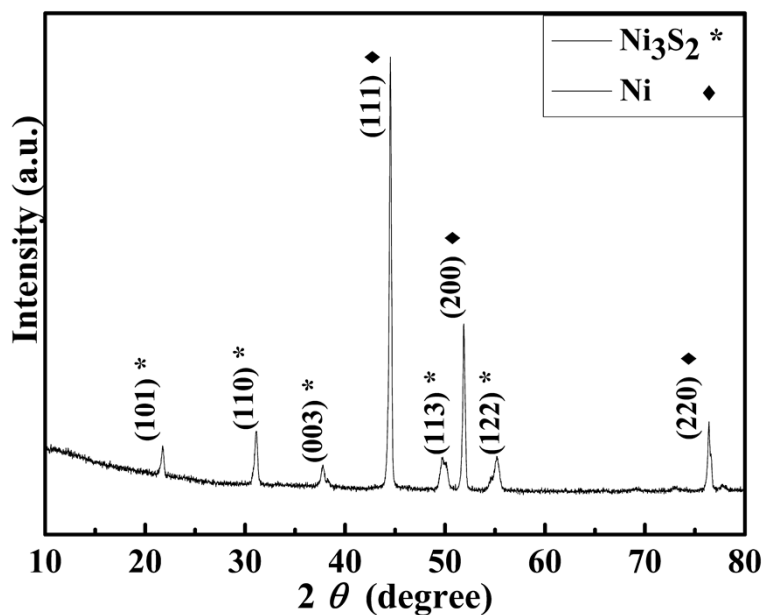

**Fig. S2** Powder XRD patterns of the  $\text{Ni}_3\text{S}_2$  NTP arrays and  $\text{Ni}_3\text{S}_2$ @CoS core-shell NTP arrays on Ni foam

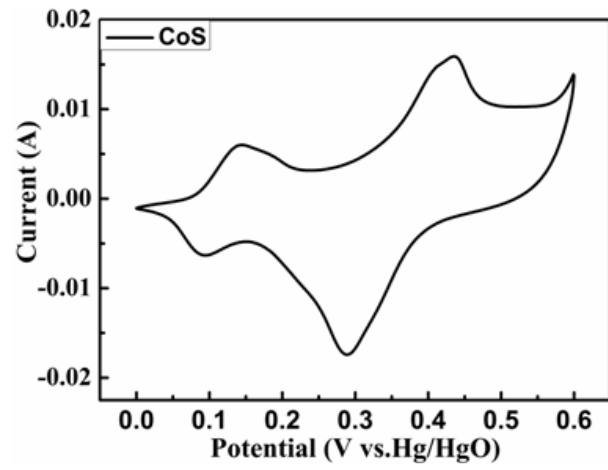

**Fig. S3** CV curves of CoS electrode at  $5 \text{ mV s}^{-1}$

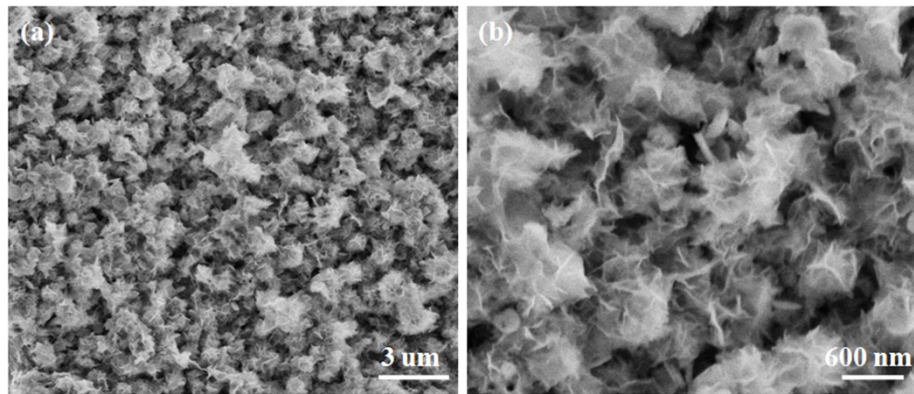

**Fig. S4** (a) the low-magnification and (b) high-magnification FESEM images of  $\text{Ni}_3\text{S}_2@\text{CoS}$  after 2000 cycles.
